# Supplementary material
Source: publisher figshare collection journal article supplement (https://acs.figshare.com/ndownloader/files/3781354)
Supplement: Supplementary file 1 [file 3781354]

# Supporting Information for

Highly Carbonylated Cellulose Nanofibrous Membranes Utilizing Maleic Anhydride Grafting for Efficient Lysozyme Adsorption

*Juncheng Ma,<sup>†,#</sup> Xueqin Wang,<sup>‡,#</sup> Qiuxia Fu,<sup>†</sup> Yang Si,<sup>‡</sup> Jianyong Yu,<sup>§</sup> and Bin Ding<sup>\*,†,‡,§</sup>*

<sup>†</sup> Key Laboratory of Textile Science & Technology, Ministry of Education, College of Textiles, Donghua University, Shanghai 201620, China

<sup>‡</sup> State Key Laboratory for Modification of Chemical Fibers and Polymer Materials, College of Materials Science and Engineering, Donghua University, Shanghai 201620, China

<sup>§</sup> Nanomaterials Research Center, Modern Textile Institute, Donghua University, Shanghai 200051, China

<sup>#</sup> These authors contributed equally to this work.

\* Corresponding author: Prof. Bin Ding (Email: binding@dhu.edu.cn)

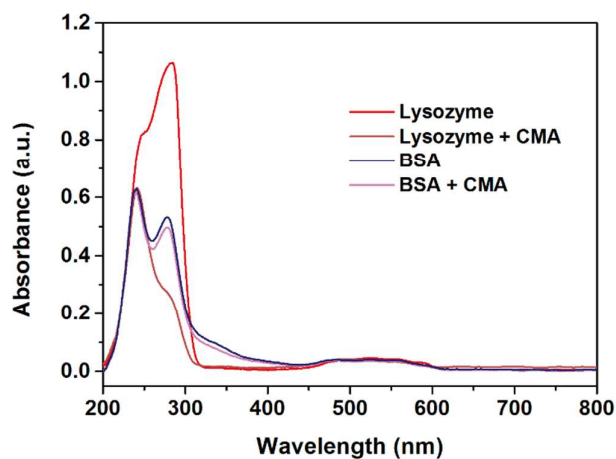

**Figure S1.** The absorption spectra shown the adsorption performance of as-prepared CMA nanofibrous membranes towards lysozyme and BSA.

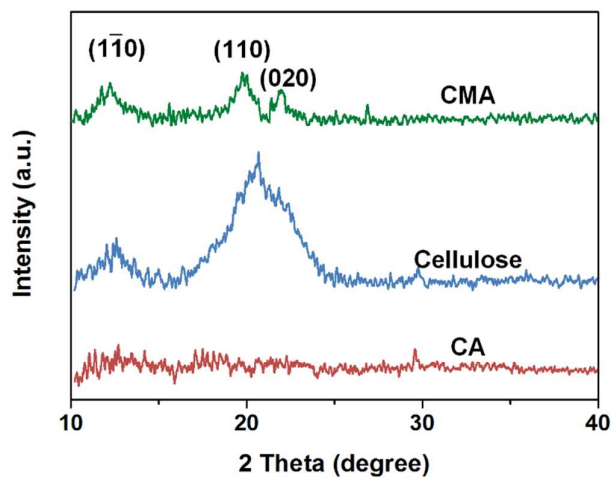

**Figure S2.** XRD spectra of CA, cellulose, and CMA nanofibrous membranes.

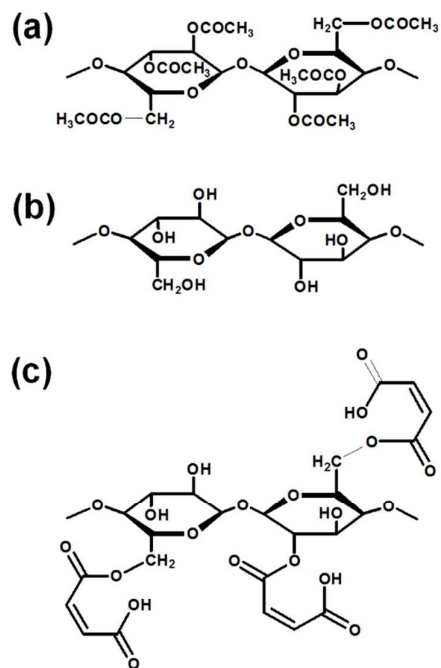

**Figure S3.** The chemical structure of (a) CA, (b) cellulose, and (c) CMA nanofibrous membranes.

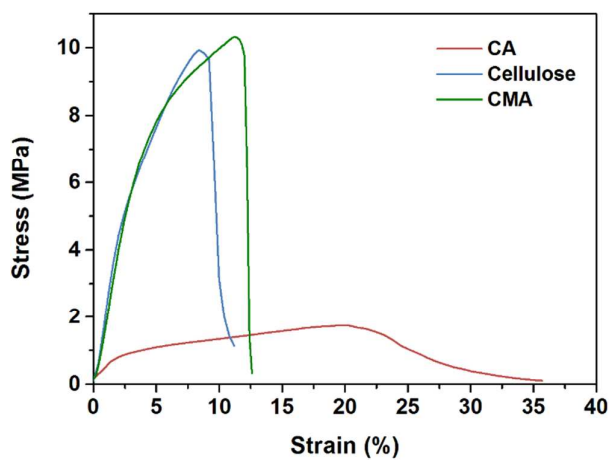

**Figure S4.** Tensile stress-strain curves of CA, cellulose, and CMA nanofibrous membranes.

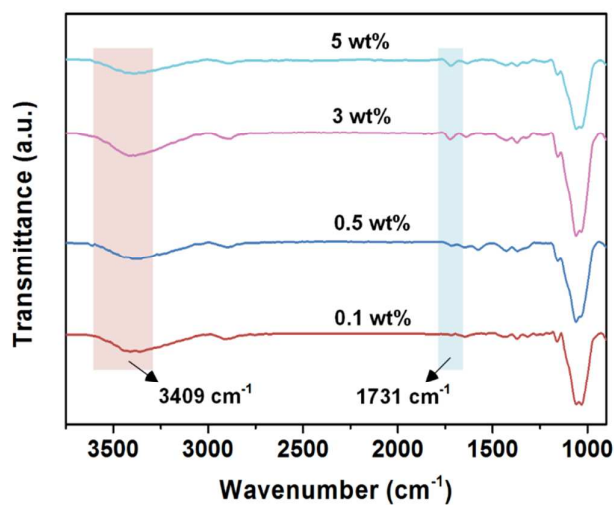

**Figure S5.** FT-IR spectra of CMA nanofibrous membranes with different contents of MA.

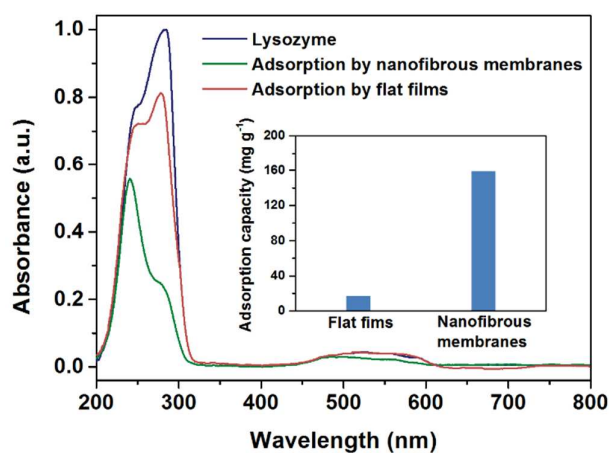

**Figure S6.** Absorption spectra of lysozyme adsorption by utilizing CMA nanofibrous membranes and filter papers. The insets shown the corresponding adsorption amount of relevant membranes.

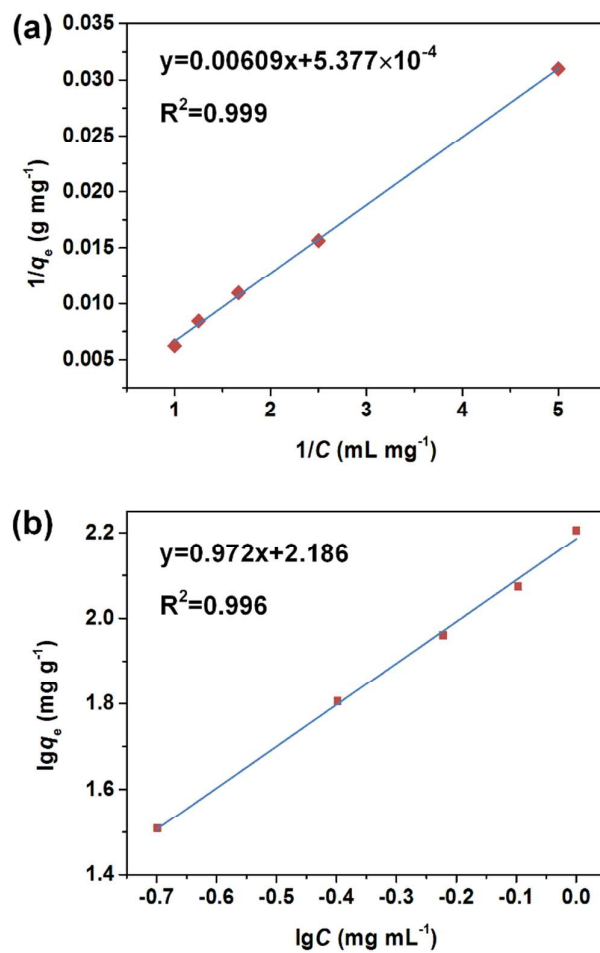

**Figure S7.** The fitting curves of (a) Langmuir and (b) Freundlich isotherm models for lysozyme adsorption on CMA nanofibrous membranes.
